# Supplementary material for: Autologous skeletal muscle derived cells expressing a novel functional dystrophin provide a potential therapy for Duchenne Muscular Dystrophy
Source: PubMed Central journal article supplement (PMC4728433; doi:10.1038/srep19750), 2016-01-27

# **Autologous skeletal muscle derived cells expressing a novel functional dystrophin provide a potential therapy for Duchenne Muscular Dystrophy**

Jinhong Meng<sup>1</sup>, John R Counsell<sup>1,2,4</sup>, Mojgan Reza<sup>3</sup>, Steven H Laval<sup>3</sup>, Olivier Danos<sup>2§</sup>, Adrian Thrasher<sup>4</sup>, Hanns Lochmüller<sup>3</sup>, Francesco Muntoni<sup>1</sup> and Jennifer E Morgan<sup>1\*</sup>

## **Supplementary material**

### **Cloning of mini-dystrophin constructs**

The truncation in C1 comprises 3672 bases between nucleotide 1619 and 5290, and 6801 bases in C2 between nucleotide 2199 and 8999 (GenBank NM 004006) (Figure 1A, supplementary materials). The 7.4 kb C1/ $\Delta$ R3-R13 and the 4.2 kb C2/ $\Delta$ H2-R23 mini-dystrophins were generated by splicing by overlapping extension (SOE-PCR) using human full-length dystrophin cDNA as template. There are 2 polymorphisms in C1 constructs: G/A in position 142 of dystrophin Exon 59, which is a non-pathogenic SNP (rs 1800280), and an extra –GCC inframe insertion at position 31 of Exon 47, which predicted by Mutationtaster website to be polymorphism. (<http://www.mutationtaster.org/cgi-bin/MutationTaster/MutationTaster69.cgi>). There are also 2 polymorphisms in the C2 construct: G/A in position 142 of dystrophin Exon 59; C/T in position 160 of Exon 59 which is a variant with low frequency in the ExAC database, predicted to be polymorphism.

The amplification products and the vector were digested with restriction enzymes *NgoMIV* and *ClaI*, purified and ligated back into the cDNA. The resulting constructs were fully sequenced (MWG Biotech, Ebersberg, Germany) for verification of the correct sequence and reading frame.

### **Generation of lentiviral vectors**

An *AgeI* site was inserted into pCMV.  $\Delta$  H2R23, immediately upstream of the dystrophin 5'UTR. pRRL.desmin.C2, was then assembled by cloning the C2 mini-dystrophin from the *AgeI*-modified pCMV.  $\Delta$  H2R23 into pRRL.sin.cppt.desmin.GFP using sites *AgeI-SalI*.

pRRL.desmin.C1 was constructed by cloning the respective regions from pCMV.  $\Delta$  R3R13 into the pRRL.desmin.C2 construct using *NsiI* and *SalI* restriction sites. A GFP tag was then introduced to all constructs by replacing the C-terminal region of each construct with that of pCihDystrophinGFP using the *BstBI* and *SalI* restriction sites for C2 and the *BstEII* and *SalI* sites for C1. For promoter comparisons, the SFFV promoter was PCR cloned from pRRL.sin.cPPT.SFFV.NIGW and inserted in place of the desmin promoter. The final clones were verified by DNA sequencing.

### **Titration of lentiviruses**

Viral RNA titres were measured in the purified viral harvests by quantitative reverse transcription polymerase chain reaction (qRT-PCR) using a commercial kit (CloneTech cat no. 631235). Viral RNA was extracted directly from the viral preparation and DNase treated prior to qRT-PCR, which was then carried out in a single reaction. Complementary DNA was generated during an initial reverse transcription step (42°C 5 min, 95°C 10 sec), which was directly followed by real time PCR amplification (40 cycles of: 95°C 5sec; 60°C 30sec). The titre was then calculated by extrapolation of a standard curve generated from RNA standards

of known copy number.

Proviral titre was determined using genomic DNA extracted from transduced HeLa cells, adapted from a reported method<sup>43</sup>. Briefly,  $1 \times 10^5$  HeLa cells were plated into each well of a 6 well plate and transduced with a range of volumes of the concentrated lentivirus. After 72 hours, the transduced HeLa genomic DNA was extracted and analysed by SYBR Green amplified qPCR. The lentiviral copy number was determined by PCR directed against the LTR using the primers 5'-AGCTTGCCTTGAGTGCTTCAA-3' and 5'-AGGGTCTGAGGGATCTCTAGTTACC-3'. The proviral copy number was normalised to the total allelic copy number by PCR of human albumin using primers 5'-GCTGTCATCTCTTGTGGGCTGT-3' and 5'-ACTCATGGGAGCTGCTGGTTC-3'.

Integrated proviral copy numbers were calculated by Alu-PCR, adapted from a reported protocol<sup>44</sup>. Briefly, 10ng of virally-transduced HeLa gDNA was amplified using conditions (95°C 15 minutes; 25 cycles of 95°C 30 sec, 55°C 30 sec, 72°C 3min30sec; 72°C 10mins) and primers Alu1 (5'-TCC CAG CTA CTG GGG AGG CTG AGG-3'), Alu2 (5'-GCC TCC CAA AGT GCT GGG ATT ACA G-3') and M667-L (5'-ATG CCA CGT AAG CGA AAC TCT GGC TAA CTA GGG AAC CCA CTG-3) to amplify integrated lentiviruses. A control reaction was processed omitting the Alu1 and Alu2 primers to account for any linear, single-stranded amplification from the M667-L oligo. The resulting amplicons were then diluted 1/100 in water and 5µl was used in a nested qPCR reaction which was amplified with a SYBR Green master mix under conditions (95°C 15 minutes; 25 cycles of 95°C 30 sec, 55°C 30 sec, 72°C 3min30sec; 72°C 10mins) and the primers AA55M (5'-GCT AGA GAT TTT CCA CAC TGA CTA A-3') and Lamda T (5'-ATG CCA CGT AAG CGA AAC T-3') to detect the incidence of LTR copies in the products. The relative level of integrated copies were calculated by  $2^{-\Delta \Delta ct}$ , in which the ct value for Alu-containing reactions was subtracted

from the control reaction, before this value was subtracted from the non-transduced sample value. The integrated proviral titre was then expressed relative to a sample of known titre.

The functional titre of the lentivirus was determined according to GFP output by transducing HeLa cells with serial dilutions of vector preparations and measuring the percentage of GFP positive cells by flow cytometry.

**Sequence of C1 construct (from ATG to EGFP)**

ATGCTTTGGTGGGAAGAAGTAGAGGACTGTTATGAAAGAGAAGATGTTCAAAG  
AAAACATTCACAAAATGGGTAAATGCACAATTTTCTAAGTTTGGGAAGCAGCAT  
ATTGAGAACCTCTTCAGTGACCTACAGGATGGGAGGCGCCTCCTAGACCTCCTCG  
AAGGCCTGACAGGGCAAAAAGTCCAAAAGAAAAGGATCCACAAGAGTTCAT  
GCCCTGAACAATGTCAACAAGGCACTGCGGGTTTTGCAGAACAATAATGTTGATT  
TAGTGAATATTGGAAGTACTGACATCGTAGATGGAAATCATAAACTGACTCTTGG  
TTTGATTTGGAATATAATCCTCCACTGGCAGGTCAAAAATGTAATGAAAAATATC  
ATGGCTGGATTGCAACAAACCAACAGTGAAAAGATTCTCCTGAGCTGGGTCCGA  
CAATCAACTCGTAATTATCCACAGGTTAATGTAATCAACTTCACCACCAGCTGGT  
CTGATGGCCTGGCTTTGAATGCTCTCATCCATAGTCATAGGCCAGACCTATTTGA  
CTGGAATAGTGTGGTTTGCCAGCAGTCAGCCACACAACGACTGGAACATGCATT  
CAACATCGCCAGATATCAATTAGGCATAGAGAACTACTCGATCCTGAAGATGT  
TGATAACCACCTATCCAGATAAGAAGTCCATCTTAATGTACATCACATCACTCTTC  
CAAGTTTTGCCTCAACAAGTGAGCATTGAAGCCATCCAGGAAGTGGAAATGTTG  
CCAAGGCCACCTAAAGTGACTAAAGAAGAACATTTTCAGTTACATCATCAAATG  
CACTATTCTCAACAGATCACGGTCAGTCTAGCACAGGGATATGAGAGAACTTCTT  
CCCCTAAGCCTCGATTCAAGAGCTATGCCTACACACAGGCTGCTTATGTCACCAC  
CTCTGACCCTACACGGAGCCCATTTCTTCACAGCATTGGAAGCTCCTGAAGAC

AAGTCATTTGGCAGTTCATTGATGGAGAGTGAAGTAAACCTGGACCGTTATCAAA  
CAGCTTTAGAAGAAGTATTATCGTGGCTTCTTTCTGCTGAGGACACATTGCAAGC  
ACAAGGAGAGATTTCTAATGATGTGGAAGTGGTGAAGACCAGTTTCATACTCA  
TGAGGGGTACATGATGGATTTGACAGCCATCAGGGCCGGGTTGGTAATATTCTA  
CAATTGGGAAGTAAGCTGATTGGAACAGGAAAATTATCAGAAGATGAAGAACT  
GAAGTACAAGAGCAGATGAATCTCCTAAATTCAAGATGGGAATGCCTCAGGGTA  
GCTAGCATGGAAAAACAAAGCAATTTACATAGAGTTTTAATGGATCTCCAGAAT  
CAGAAACTGAAAGAGTTGAATGACTGGCTAACAAAAACAGAAGAAAGAACAAG  
GAAAATGGAGGAAGAGCCTCTTGGACCTGATCTTGAAGACCTAAAACGCCAAGT  
ACAACAACATAAGGTGCTTCAAGAAGATCTAGAACAAGAACAAGTCAGGGTCAA  
TTCTCTCACTCACATGGTGGTGGTAGTTGATGAATCTAGTGGAGATCACGCAACT  
GCTGCTTTGGAAGAACAACCTAAGGTATTGGGAGATCGATTTGCAGCCATTTAC  
ACAGAATTAAGACTGGAAAGGCCTCCATTCCTTTGAAGGAATTGGAGCAGTTTA  
ACTCAGATATACAAAAATTGCTTGAACCACTGGAGGCTGAAATTCAGCAGGGGG  
TGAATCTGAAAGAGGAAGACTTCAATAAAGATATGAATGAAGACAATGAGGGTA  
CTGTAAAAGAATTGTTGCAAAGAGGAGACAACCTTACAACAAAGAATCACAGATG  
AGAGAAAGCGAGAGGAAATAAAGATAAAACAGCAGCTGTTACAGACAAAACAT  
AATGCTCTCAAGGATTTGAGGTCTCAAAGAAGAAAAAAGGCTCTAGAAATTTCT  
CATCAGTGGTATCAGTACAAGAGGCAGGCTGATGATCTCCTGAAATGCTTGGAT  
GACATTGAAAAAAAATTAGCCAGCCTACCTGAGCCCAGAGATGAAAGGAAAATA  
AAGGAAATTGATCGGGAATTGCAGAAGAAGAAAGAGGAGCTGAATGCAGTGCG  
TAGGCAAGCTGAGGGCTTGTCTGAGGATGGGGCCGCAATGGCAGTGGAGCCAAC  
TCAGATCCAGCTCAGCAAGCGCTGGCGGGAAATTGAGAGCAAATTTGCTCAGTT  
TCGAAGACTCAACTTTGCACAAATTCACACTGTCCGTGAAGAAACGATGATGGT  
GATGACTGAAGACATGCCTTTGGAAATTTCTTATGTGCCTTCTACTTATTTGACTG

AAATCACTCATGTCTCACAAAGCCCTATTAGAAGTGGAACAACCTTCTCAATGCTCC  
TGACCTCTGTGCTAAGGACTTTGAAGATCTCTTTAAGCAAGAGGAGTCTCTGAAG  
AATATAAAAGATAGTCTACAACAAAGCTCAGGTCGGATTGACATTATTCATAGC  
AAGAAGACAGCAGCATTGCAAAGTGCAACGCCTGTGGAAAGGGTGAAGCTACA  
GGAAGCTCTCTCCCAGCTTGATTTCCAATGGGAAAAAGTTAACAAAATGTACAA  
GGACCGACAAGGGCGATTTGACAGATCTGTTGAGAAATGGCGGCGTTTTTCATTAT  
GATATAAAGATATTTAATCAGTGGCTAACAGAAGCTGAACAGTTTCTCAGAAAG  
ACACAAATTCCTGAGAATTGGGAACATGCTAAATACAAATGGTATCTTAAGGAA  
CTCCAGGATGGCATTGGGCAGCGGCAAACCTGTTGTCAGAACATTGAATGCAACT  
GGGGAAGAAATAATTCAGCAATCCTCAAAAACAGATGCCAGTATTCTACAGGAA  
AAATTGGGAAGCCTGAATCTGCGGTGGCAGGAGGTCTGCAAACAGCTGTCAGAC  
AGAAAAAAGAGGCTAGAAGAACAAAAGAATATCTTGTCAGAATTTCAAAGAGAT  
TTAAATGAATTTGTTTTATGGTTGGAGGAAGCAGATAACATTGCTAGTATCCCAC  
TTGAACCTGGAAAAGAGCAGCAACTAAAAGAAAAGCTTGAGCAAGTCAAGTTAC  
TGGTGGAAGAGTTGCCCTGCGCCAGGGCCGAATTCTCAAACAATTAATGAAA  
CTGGAGGACCCGTGCTTGTAAGTGCTCCATAAGCCCAGAAGAGCAAGATAAAC  
TTGAAAATAAGCTCAAGCAGACAAATCTCCAGTGGATAAAGGTTTCCAGAGCTT  
TACCTGAGAAACAAGGAGAAATTGAAGCTCAAATAAAAAGACCTTGGGCAGCTTG  
AAAAAAAGCTTGAAGACCTTGAAGAGCAGTTAAATCATCTGCTGCTGTGGTTATC  
TCCTATTAGGAATCAGTTGGAAATTTATAACCAACCAACCAAGAAGGACCATTT  
GACGTTAAGGAAACTGAAATAGCAGTTCAAGCTAAACAACCGGATGTGGAAGAG  
ATTTTGTCTAAAGGGCAGCATTGTACAAGGAAAAACCAGCCACTCAGCCAGTG  
AAGAGGAAGTTAGAAGATCTGAGCTCTGAGTGGAAGGCGGTAAACCGTTTACTT  
CAAGAGCTGAGGGCAAAGCAGCCTGACCTAGCTCCTGGACTGACCACTATTGGA  
GCCTCTCCTACTCAGACTGTTACTCTGGTGACACAACCTGTGGTTACTAAGGAAA

CTGCCATCTCCAAACTAGAAATGCCATCTTCCTTGATGTTGGAGGTACCTGCTCT  
GGCAGATTTCAACCGGGCTTGGACAGAACTTACCGACTGGCTTTCTCTGCTTGAT  
CAAGTTATAAAATCACAGAGGGTGATGGTGGGTGACCTTGAGGATATCAACGAG  
ATGATCATCAAGCAGAAGGCAACAATGCAGGATTTGGAACAGAGGCGTCCCCAG  
TTGGAAGAACTCATTACCGCTGCCCAAATTTGAAAAACAAGACCAGCAATCAA  
GAGGCTAGAACAATCATTACGGATCGAATTGAAAGAATTCAGAATCAGTGGGAT  
GAAGTACAAGAACACCTTCAGAACCGGAGGCAACAGTTGAATGAAATGTTAAAG  
GATTCAACACAATGGCTGGAAGCTAAGGAAGAAGCTGAGCAGGTCTTAGGACAG  
GCCAGAGCCAAGCTTGAGTCATGGAAGGAGGGTCCCTATACAGTAGATGCAATC  
CAAAGAAAATCACAGAAACCAAGCAGTTGGCCAAAGACCTCCGCCAGTGGCA  
GACAAATGTAGATGTGGCAAATGACTTGGCCCTGAAACTTCTCCGGGATTATTCT  
GCAGATGATACCAGAAAAGTCCACATGATAACAGAGAATATCAATGCCTCTTGG  
AGAAGCATTATAAAAGGGTGAGTGAGCGAGAGGCTGCTTTGGAAGAACTCAT  
AGATTACTGCAACAGTTCCCCCTGGACCTGGAAAAGTTTCTTGCTGGCTTACAG  
AAGCTGAAACAACCTGCCAATGTCCTACAGGATGCTACCCGTAAGGAAAGGCTCC  
TAGAAGACTCCAAGGGAGTAAAAGAGCTGATGAAACAATGGCAAGACCTCCAA  
GGTGAAATTGAAGCTCACACAGATGTTTATCACAACTGGATGAAAACAGCCAA  
AAAATCCTGAGATCCCTGGAAGGTTCCGATGATGCAGTCCTGTTACAAAGACGTT  
TGGATAACATGAACTTCAAGTGGAGTGAACCTCGGAAAAAGTCTCTCAACATTA  
GGTCCCATTTGGAAGCCAGTTCTGACCAGTGGAAGCGTCTGCACCTTTCTCTGCA  
GAACTTCTGGTGTGGCTACAGCTGAAAGATGATGAATTAAGCCGGCAGGCACC  
TATTGGAGGCGACTTTCAGCAGTTCAGAAGCAGAACGATGTACATAGGGCCTT  
CAAGAGGGAATTGAAAACCTAAAGAACCTGTAATCATGAGTACTCTTGAGACTGT  
ACGAATATTTCTGACAGAGCAGCCTTTGGAAGGACTAGAGAACTCTACCAGGA  
GCCAGAGAGCTGCCTCCTGAGGAGAGAGCCCAGAATGTCACCTCGGCTTCTACG

AAAGCAGGCTGAGGAGGTCAATACTGAGTGGGAAAAATTGAACCTGCACTCCGC  
TACTGGCAGAGAAAAATAGATGAGACCCTTGAAAGACTCCAGGAACCTCAAGA  
GGCCACGGATGAGCTGGACCTCAAGCTGCGCCAAGCTGAGGTGATCAAGGGATC  
CTGGCAGCCCGTGGGCGATCTCCTCATTGACTCTCTCCAAGATCACCTCGAGAAA  
GTCAAGGCACTTCGAGGAGAAATTGCGCCTCTGAAAGAGAACGTGAGCCACGTC  
AATGACCTTGCTCGCCAGCTTACCACTTTGGGCATTCAGCTCTCACCGTATAACC  
TCAGCACTCTGGAAGACCTGAACACCAGATGGAAGCTTCTGCAGGTGGCCGTCG  
AGGACCGAGTCAGGCAGCTGCATGAAGCCACAGGGACTTTGGTCCAGCATCTC  
AGCACTTTCTTTCCACGTCTGTCCAGGGTCCCTGGGAGAGAGCCATCTCGCCAAA  
CAAAGTGCCCTACTATATCAACCACGAGACTCAAACAACCTTGCTGGGACCATCCC  
AAAATGACAGAGCTCTACCAGTCTTTAGCTGACCTGAATAATGTCAGATTCTCAG  
CTTATAGGACTGCCATGAAACTCCGAAGACTGCAGAAGGCCCTTTGCTTGGATCT  
CTTGAGCCTGTCAGCTGCATGTGATGCCTTGGACCAGCACAACTCAAGCAAAT  
GACCAGCCCATGGATATCCTGCAGATTATTAATTGTTTGACCACTATTTATGACC  
GCCTGGAGCAAGAGCACAAACAATTTGGTCAACGTCCCTCTCTGCGTGGATATGTG  
TCTGAACTGGCTGCTGAATGTTTATGATACGGGACGAACAGGGAGGATCCGTGT  
CCTGTCTTTTAAACTGGCATCATTTCCTGTGTAAAGCACATTTGGAAGACAAG  
TACAGATACCTTTTCAAGCAAGTGGCAAGTTCAACAGGATTTTGTGACCAGCGCA  
GGCTGGGCCTCCTTCTGCATGATTCTATCCAAATTCCAAGACAGTTGGGTGAAGT  
TGCATCCTTTGGGGGCAGTAACATTGAGCCAAGTGTCCGGAGCTGCTTCCAATTT  
GCTAATAATAAGCCAGAGATCGAAGCGGCCCTCTTCCTAGACTGGATGAGACTG  
GAACCCAGTCCATGGTGTGGCTGCCCGTCCTGCACAGAGTGGCTGCTGCAGAA  
ACTGCCAAGCATCAGGCCAAATGTAACATCTGCAAAGAGTGTCCAATCATTGGA  
TTCAGGTACAGGAGTCTAAAGCACTTTAATTATGACATCTGCCAAAGCTGCTTTT  
TTTCTGGTCGAGTTGCAAAAGGCCATAAAATGCACTATCCCATGGTGGAAATATTG



CACTCCGACTACATCAGGAGAAGATGTTTCGAGACTTTGCCAAGGTACTAAAAAA  
CAAATTTTGAACCAAAGGTATTTTGCGAAGCATCCCCGAATGGGCTACCTGCCA  
GTGCAGACTGTCTTAGAGGGGGACAACATGGAAACTCCCGTTACTCTGATCAACT  
TCTGGCCAGTAGATTCTGCGCCTGCCTCGTCCCCTCAGCTTTCACACGATGATACT  
CATTCACGCATTGAACATTATGCTAGCAGGCTAGCAGAAATGGAAAACAGCAAT  
GGATCTTATCTAAATGATAGCATCTCTCCTAATGAGAGCATAGATGATGAACATT  
TGTTAATCCAGCATTACTGCCAAAGTTTGAACCAGGACTCCCCCCTGAGCCAGCC  
TCGTAGTCCTGCCAGATCTTGATTTCTTAGAGAGTGAGGAAAGAGGGGAGCT  
AGAGAGAATCCTAGCAGATCTTGAGGAAGAAAACAGGAATCTGCAAGCAGAAT  
ATGACCGTCTAAAGCAGCAGCACGAACATAAAGGCCTGTCCCCACTGCCGTCCC  
CTCCTGAAATGATGCCACCTCTCCCCAGAGTCCCCGGGATGCTGAGCTCATTGC  
TGAGGCCAAGCTACTGCGTCAACACAAAGGCCGCCTGGAAGCCAGGATGCAAAT  
CCTGGAAGACCACAATAAACAGCTGGAGTCACAGTTACACAGGCTAAGGCAGCT  
GCTGGAGCAACCCCAGGCAGAGGCCAAAGTGAATGGCACAACGGTGTCTCTCC  
TTCTACCTCTCTACAGAGGTCCGACAGCAGTCAGCCTATGCTGCTCCGAGTGGTT  
GGCAGTCAAACCTTCGGACTCCATGGGTGAGGAAGATCTTCTCAGTCCTCCCCAGG  
ACACAAGCACAGGGTTAGAGGAGGTGATGGAGCAACTCAACAACCTCTTCCCTA  
GTTCAAGAGGAAGAAATACCCCTGGAAAGCCAATGAGAGAGGACACAATGGCC  
ACAACCATGGTGAGCAAGGGCGAGGAGCTGTTACCGGGGTGGTGCCCATCCTG  
GTCGAGCTGGACGGCGACGTAAACGGCCACAAGTTCAGCGTGTCCGGCGAGGGC  
GAGGGCGATGCCACCTACGGCAAGCTGACCCTGAAGTTCATCTGCACCACCGGC  
AAGCTGCCCCTGCCCTGGCCCACCTCGTGACCACCTGACCTACGGCGTGCAGT  
GCTTCAGCCGCTACCCCGACCACATGAAGCAGCACGACTTCTTCAAGTCCGCCAT  
GCCCCAAGGCTACGTCCAGGAGCGCACCATCTTCTTCAAGGACGACGGCAACTA  
CAAGACCCGCGCCGAGGTGAAGTTCGAGGGCGACACCCTGGTGAACCGCATCGA

GCTGAAGGGCATCGACTTCAAGGAGGACGGCAACATCCTGGGGCACAAGCTGGA  
GTACAACTACAACAGCCACAACGTCTATATCATGGCCGACAAGCAGAAGAACGG  
CATCAAGGTGAACTTCAAGATCCGCCACAACATCGAGGACGGCAGCGTGCAGCT  
CGCCGACCACTACCAGCAGAACACCCCCATCGGCGACGGCCCCGTGCTGCTGCC  
CGACAACCACTACCTGAGCACCCAGTCCGCCCTGAGCAAAGACCCCAACGAGAA  
GCGCGATCACATGGTCCTGCTGGAGTTCGTGACCGCCGCCGGGATCACTCTCGGC  
ATGGACGAGCTGTACAAGTAAA

**Sequence of C2 construct (from ATG to EGFP):**

ATGCTTTGGTGGGAAGAAGTAGAGGACTGTTATGAAAGAGAAGATGTTCAAAG  
AAAACATTCACAAAATGGGTAAATGCACAATTTTCTAAGTTTGGGAAGCAGCAT  
ATTGAGAACCTCTTCAGTGACCTACAGGATGGGAGGCGCCTCCTAGACCTCCTCG  
AAGGCCTGACAGGGCAAAAAGTCCAAAAGAAAAAGGATCCACAAGAGTTCAT  
GCCCTGAACAATGTCAACAAGGCACTGCGGGTTTTGCAGAACAATAATGTTGATT  
TAGTGAATATTGGAAGTACTGACATCGTAGATGGAAATCATAAACTGACTCTTGG  
TTTGATTTGGAATATAATCCTCCACTGGCAGGTCAAAAATGTAATGAAAAATATC  
ATGGCTGGATTGCAACAAACCAACAGTGAAAAGATTCTCCTGAGCTGGGTCCGA  
CAATCAACTCGTAATTATCCACAGGTAAATGTAATCAACTTCACCACCAGCTGGT  
CTGATGGCCTGGCTTTGAATGCTCTCATCCATAGTCATAGGCCAGACCTATTTGA  
CTGGAATAGTGTGGTTTGCCAGCAGTCAGCCACACAACGACTGGAACATGCATT  
CAACATCGCCAGATATCAATTAGGCATAGAGAACTACTCGATCCTGAAGATGT  
TGATAACCACCTATCCAGATAAGAAGTCCATCTTAATGTACATCACATCACTCTTC  
CAAGTTTTGCCTCAACAAGTGAGCATTGAAGCCATCCAGGAAGTGGAAATGTTG  
CCAAGGCCACCTAAAGTGACTAAAGAAGAACATTTTCAGTTACATCATCAAATG  
CACTATTCTCAACAGATCACGGTCAGTCTAGCACAGGGATATGAGAGAACTTCTT

CCCCTAAGCCTCGATTCAAGAGCTATGCCTACACACAGGCTGCTTATGTCACCAC  
CTCTGACCCTACACGGAGCCCATTTCCTTACAGCATTGGAAGCTCCTGAAGAC  
AAGTCATTTGGCAGTTCATTGATGGAGAGTGAAGTAAACCTGGACCGTTATCAAA  
CAGCTTTAGAAGAAGTATTATCGTGGCTTCTTTCTGCTGAGGACACATTGCAAGC  
ACAAGGAGAGATTTCTAATGATGTGGAAGTGGTGAAAGACCAGTTTCATACTCA  
TGAGGGGTACATGATGGATTTGACAGCCCATCAGGGCCGGGTTGGTAATATTCTA  
CAATTGGGAAGTAAGCTGATTGGAACAGGAAAATTATCAGAAGATGAAGAACT  
GAAGTACAAGAGCAGATGAATCTCCTAAATTCAAGATGGGAATGCCTCAGGGTA  
GCTAGCATGGAAAAACAAAGCAATTTACATAGAGTTTTAATGGATCTCCAGAAT  
CAGAACTGAAAGAGTTGAATGACTGGCTAACAAAAACAGAAGAAAGAACAAG  
GAAAATGGAGGAAGAGCCTCTTGGACCTGATCTTGAAGACCTAAAACGCCAAGT  
ACAACAACATAAGGTGCTTCAAGAAGATCTAGAACAAGAACAAGTCAGGGTCAA  
TTCTCTCACTCACATGGTGGTGGTAGTTGATGAATCTAGTGGAGATCACGCAACT  
GCTGCTTTGGAAGAACAACCTTAAGGTATTGGGAGATCGATGGGCAAACATCTGT  
AGATGGACAGAAGACCGCTGGGTTCTTTTACAAGACATCCTTCTCAAATGGCAAC  
GTCTTACTGAAGAACAGTGCCTTTTTAGTGCATGGCTTTCAGAAAAAGAAGATGC  
AGTGAACAAGATTCACACAACCTGGCTTTAAAGATCAAAATGAAATGTTATCAAG  
TCTTCAAAAACCTGGCCGTTTTAAAAGCGGATCTAGAAAAGAAAAAGCAATCCAT  
GGGCAAACCTGTATTCACTCAAACAAGATCTTCTTTCAACACTGAAGAATAAGTCA  
GTGACCCAGAAGACGGAAGCATGGCTGGATAACTTTGCCCGGTGTTGGGATAAT  
TTAGTCCAAAAACTTGAAAAGAGTACAGCACAGACCCTTGAAAGACTCCAGGAA  
CTTCAAGAGGCCATGGATGAGCTGGACCTCAAGCTGCGCCAAGCTGAGGTGATC  
AAGGGATCCTGGCAGCCCGTGGGCGATCTCCTCATTGACTCTCTCCAAGATCACC  
TCGAGAAAGTCAAGGCACTTCGAGGAGAAATTGCGCCTCTGAAAGAGAACGTGA  
GCCACGTCAATGACCTTGCTCGCCAGCTTACCACTTTGGGCATTCAGCTCTCACC

GTATAACCTCAGCACTCTGGAAGACCTGAACACCAGATGGAAGCTTCTGCAGGT  
GGCCGTCGAGGACCGAGTCAGGCAGCTGCATGAAGCCCACAGGGACTTTGGTCC  
AGCATCTCAGCACTTTCTTTCCACGTCTGTCCAGGGTCCCTGGGAGAGAGCCATC  
TCGCCAAACAAAGTGCCCTACTATATCAACCACGAGACTCAAACAACCTTGCTGG  
GACCATCCCAAATGACAGAGCTCTACCAGTCTTTAGCTGACCTGAATAATGTCA  
GATTCTCAGCTTATAGGACTGCCATGAAACTCCGAAGACTGCAGAAGGCCCTTTG  
CTTGGATCTCTTGAGCCTGTCAGCTGCATGTGATGCCTTGGACCAGCACAACTC  
AAGCAAAATGACCAGCCCATGGATATCCTGCAGATTATTAATTGTTTGACCACTA  
TTTATGACCGCCTGGAGCAAGAGCACAACAATTTGGTCAACGTCCCTCTCTGCGT  
GGATATGTGTCTGAACTGGCTGCTGAATGTTTATGATACGGGACGAACAGGGAG  
GATCCGTGTCCTGTCTTTTAAAACCTGGCATCATTTCCCTGTGTAAAGCACATTTGG  
AAGACAAGTACAGATACCTTTTCAAGCAAGTGGCAAGTTCAACAGGATTTTGTG  
ACCAGCGCAGGCTGGGCCTCCTTCTGCATGATTCTATCCAAATTCCAAGACAGTT  
GGGTGAAGTTGCATCCTTTGGGGGCAGTAACATTGAGCCAAGTGTCCGGAGCTG  
CTTCCAATTTGCTAATAATAAGCCAGAGATCGAAGCGGCCCTCTTCCTAGACTGG  
ATGAGACTGGAACCCCAGTCCATGGTGTGGCTGCCCCGTCCTGCACAGAGTGGCT  
GCTGCAGAACTGCCAAGCATCAGGCCAAATGTAACATCTGCAAAGAGTGTCCA  
ATCATTGGATTCAGGTACAGGAGTCTAAAGCACTTTAATTATGACATCTGCCAAA  
GCTGCTTTTTTTCTGGTCGAGTTGCAAAAGGCCATAAAATGCACTATCCCATGGT  
GGAATATTGCACTCCGACTACATCAGGAGAAGATGTTTCGAGACTTTGCCAAGGT  
ACTAAAAACAAATTTGGAACCAAAGGTATTTTGCGAAGCATCCCCGAATGGG  
CTACCTGCCAGTGCAGACTGTCTTAGAGGGGGACAACATGGAAACTCCCGTTACT  
CTGATCAACTTCTGGCCAGTAGATTCTGCGCCTGCCTCGTCCCCTCAGCTTTCACA  
CGATGATACTCATTACGCATTGAACATTATGCTAGCAGGCTAGCAGAAATGGA  
AAACAGCAATGGATCTTATCTAAATGATAGCATCTCTCCTAATGAGAGCATAGAT

GATGAACATTTGTTAATCCAGCATTACTGCCAAAGTTTGAACCAGGACTCCCCC  
TGAGCCAGCCTCGTAGTCCTGCCAGATCTTGATTTCTTAGAGAGTGAGGAAAG  
AGGGGAGCTAGAGAGAATCCTAGCAGATCTTGAGGAAGAAAACAGGAATCTGC  
AAGCAGAATATGACCGTCTAAAGCAGCAGCACGAACATAAAGGCCTGTCCCCAC  
TGCCGTCCCCTCCTGAAATGATGCCACCTCTCCCAGAGTCCCCGGGATGCTGA  
GCTCATTGCTGAGGCCAAGCTACTGCGTCAACACAAAGGCCGCCTGGAAGCCAG  
GATGCAAATCCTGGAAGACCACAATAAACAGCTGGAGTCACAGTTACACAGGCT  
AAGGCAGCTGCTGGAGCAACCCCAGGCAGAGGCCAAAGTGAATGGCACAACGG  
TGTCTCTCCTTCTACCTCTCTACAGAGGTCCGACAGCAGTCAGCCTATGCTGCTC  
CGAGTGGTTGGCAGTCAAACCTTCGGACTCCATGGGTGAGGAAGATCTTCTCAGTC  
CTCCCCAGGACACAAGCACAGGGTTAGAGGAGGTGATGGAGCAACTCAACAAC  
CCTTCCCTAGTTCAAGAGGAAGAAATACCCCTGGAAAGCCAATGAGAGAGGACA  
CAATGGCCACAACCATGGTGAGCAAGGGCGAGGAGCTGTTACCGGGGTGGTGC  
CCATCCTGGTCGAGCTGGACGGCGACGTAAACGGCCACAAGTTCAGCGTGTCCG  
GCGAGGGCGAGGGCGATGCCACCTACGGCAAGCTGACCCTGAAGTTCATCTGCA  
CCACCGGCAAGCTGCCCCTGCCCTGGCCCACCCTCGTGACCACCCTGACCTACGG  
CGTGCAGTGCTTCAGCCGCTACCCCGACCACATGAAGCAGCACGACTTCTTCAAG  
TCCGCCATGCCCGAAGGCTACGTCCAGGAGCGCACCATCTTCTTCAAGGACGAC  
GGCAACTACAAGACCCGCGCCGAGGTGAAGTTCGAGGGCGACACCCTGGTGAAC  
CGCATCGAGCTGAAGGGCATCGACTTCAAGGAGGACGGCAACATCCTGGGGCAC  
AAGCTGGAGTACAACACTACAACAGCCACAACGTCTATATCATGGCCGACAAGCAG  
AAGAACGGCATCAAGGTGAACTTCAAGATCCGCCACAACATCGAGGACGGCAGC  
GTGCAGCTCGCCGACCACTACCAGCAGAACACCCCCATCGGCGACGGCCCCGTG  
CTGCTGCCCGACAACCACTACCTGAGCACCCAGTCCGCCCTGAGCAAAGACCCC

AACGAGAAGCGCGATCACATGGTCCTGCTGGAGTTCGTGACCGCCGCCGGGATC  
 ACTCTCGGCATGGACGAGCTGTACAAGTAAA

**Table S1. Primers spanning the promoter to EGFP region of the constructs used for PCR on genomic DNAs extracted from SFFV-C1-GFP and SFFV-C2-GFP transduced cells.**

| Cell type | PCR fragment | Forward primer          | Reverse primer         | Size   |
|-----------|--------------|-------------------------|------------------------|--------|
| SC1       | 1            | ACCCATCAGATGTTTCCAGGC   | ATGCATGTTCCAGTCGTTGTG  | 842bp  |
|           | 2            | GAGCTGGGTCCGACAATCAA    | CATGCTAGCTACCCTGAGGC   | 894bp  |
|           | 3            | TGGGAAGTAAGCTGATTGGAACA | CTTGCCTACGCACTGCATTC   | 920bp  |
|           | 4            | GTACAAGAGGCAGGCTGATGA   | AATGCCATCCTGGAGTTCCTT  | 813bp  |
|           | 5            | CGACAAGGGCGATTTGACAG    | CCTCTTCACTGGCTGAGTGG   | 923bp  |
|           | 6            | AGCAGTTCAAGCTAAACAACCG  | TGACTCAAGCTTGGCTCTGG   | 705bp  |
|           | 7            | AACCGGAGGCAACAGTTGAA    | GACGCTTCCACTGGTCAGAA   | 720bp  |
|           | 8            | TCCTGAGATCCCTGGAAGGTT   | GACGTGGCTCACGTTCTCTT   | 700bp  |
|           | 9            | TCAAGAGGCCACGGATGAG     | TATCCACGCAGAGAGGGACG   | 712bp  |
|           | 10           | CCTTGGACCAGCACAACCTC    | AGAGTAACGGGAGTTTCCATGT | 840bp  |
|           | 11           | TGCACTCCGACTACATCAGG    | TGGTTGTGGCCATTGTGTCC   | 987bp  |
|           | 12           | AGCACAGGGTTAGAGGAGGT    | CTCAGGTAGTGGTTGTCTGGG  | 715bp  |
| SC2       | 1            | ACCCATCAGATGTTTCCAGGC   | ATGCATGTTCCAGTCGTTGTG  | 842bp  |
|           | 2            | GAGCTGGGTCCGACAATCAA    | CATGCTAGCTACCCTGAGGC   | 894bp  |
|           | 3            | TGGGAAGTAAGCTGATTGGAACA | TACGGTGAGAGCTGAATGCC   | 1030bp |
|           | 4            | AGAAAAAGCAATCCATGGGCA   | TATCCACGCAGAGAGGGACG   | 894bp  |
|           | 5            | CCTTGGACCAGCACAACCTC    | AGATCTGGGCAGGACTACGA   | 1089bp |
|           | 6            | CCCTCAGCTTTCACACGATGA   | CTCAGGTAGTGGTTGTCTGGG  | 1398bp |
|           | 7            | AGCACAGGGTTAGAGGAGGT    | CTCAGGTAGTGGTTGTCTGGG  | 715bp  |

**Supplementary Figure legends:**

Figure S1. Transduction efficiency of SFFV-C1-GFP, hDesmin-C1-GFP, SFFV-C2-GFP, hDesmin-C2-GFP, SFFV-GFP and hDesmin-GFP lentivirus in DMD pericytes, analysed by FACS.

Figure S2: Full length, uncropped western blotting image of Figure 2B showing the expression of GFP (red) and tubulin 2.1 (green) by proliferating CD133+ cells (negative

control), non-transduced pericytes (NT), pericytes transduced with SFFV-GFP (SG), hDesmin-GFP (DG), SFFV-C1-GFP (SC1), hDesmin-C1-GFP (DC1), SFFV-C2-GFP (SC2) and hDesmin-C2-GFP(DC2) lentiviruses. GFP bands of 27KD were expressed by SG and DG cells. A GFP band of 312KD was expressed by SC1 cells, and a 168KD GFP band by SC2 and DC2 cells; all of these are the expected molecular weight.

Figure S3: Detection of dystrophin C1-GFP in cells transduced with SFFV-C1-GFP (SC1) or Desmin-C1-GFP (DC1) lentiviruses, by western blot using either dystrophin or GFP antibodies. Mouse anti-GAPDH antibody was used as loading control. Cells maintained *in vitro* under both proliferating and differentiated conditions were analysed. Both dystrophin and GFP antibodies recognize the same protein at the expected molecular weight.

Figure S4: Full length, uncropped western blotting image of Figure S3 showing 2 western blots that were run in parallel, to determine the staining pattern of poly-dystrophin antibody and GFP antibody on cells transduced with SC1 or DC1 lentiviruses. Blot 1 (A, B, and C) was incubated with polyclonal dystrophin antibody (A and C, red) and the GAPDH antibody (B and C, green), blot 2 was incubated with polyclonal GFP (D and F, red), myosin (MF20, green in E and F, 200KD band) and GAPDH antibody (green in E and F, 37KD). C and F are merged image of A, B and D, E, respectively. The results show similar staining pattern of dystrophin and GFP antibody by western blot, thus GFP was subsequently used as surrogate marker for dystrophin in this study. Sample ID: Lane 1: none transduced cells; 2: SC1 transduced cells (non-differentiated); 3: DC1 transduced cells (non-differentiated); 4: SC1 transduced cells 7 days after differentiation; 5: DC1 transduced cells 7 days after differentiation.

Figure S1

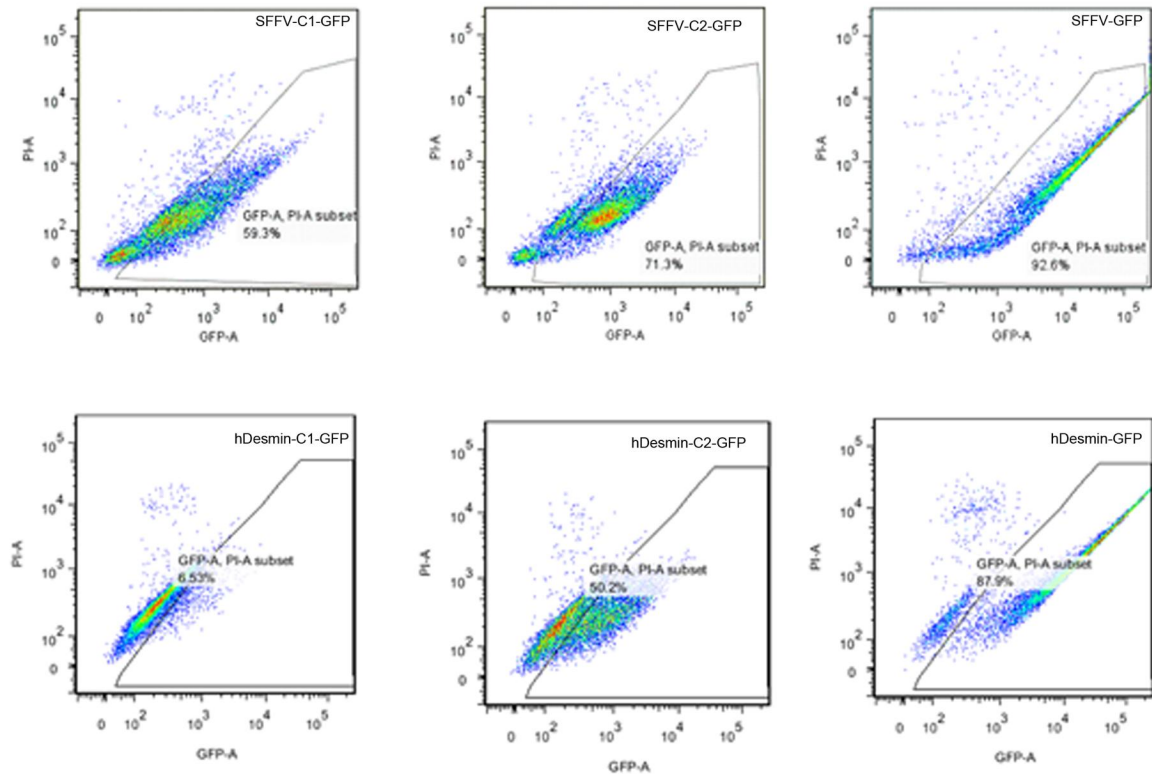



Figure S2

CD133+ NT SG DG SC1 DC1 SC2 DC2

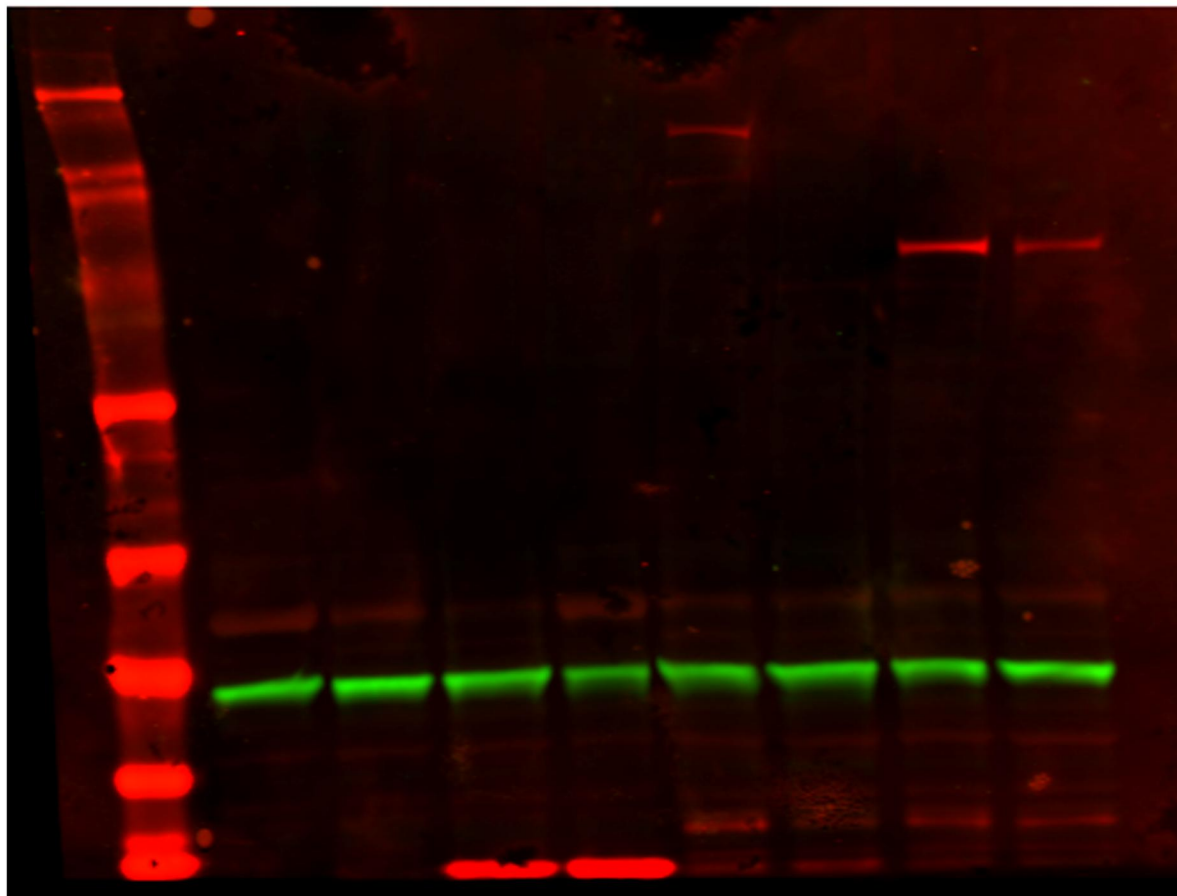

Figure S3

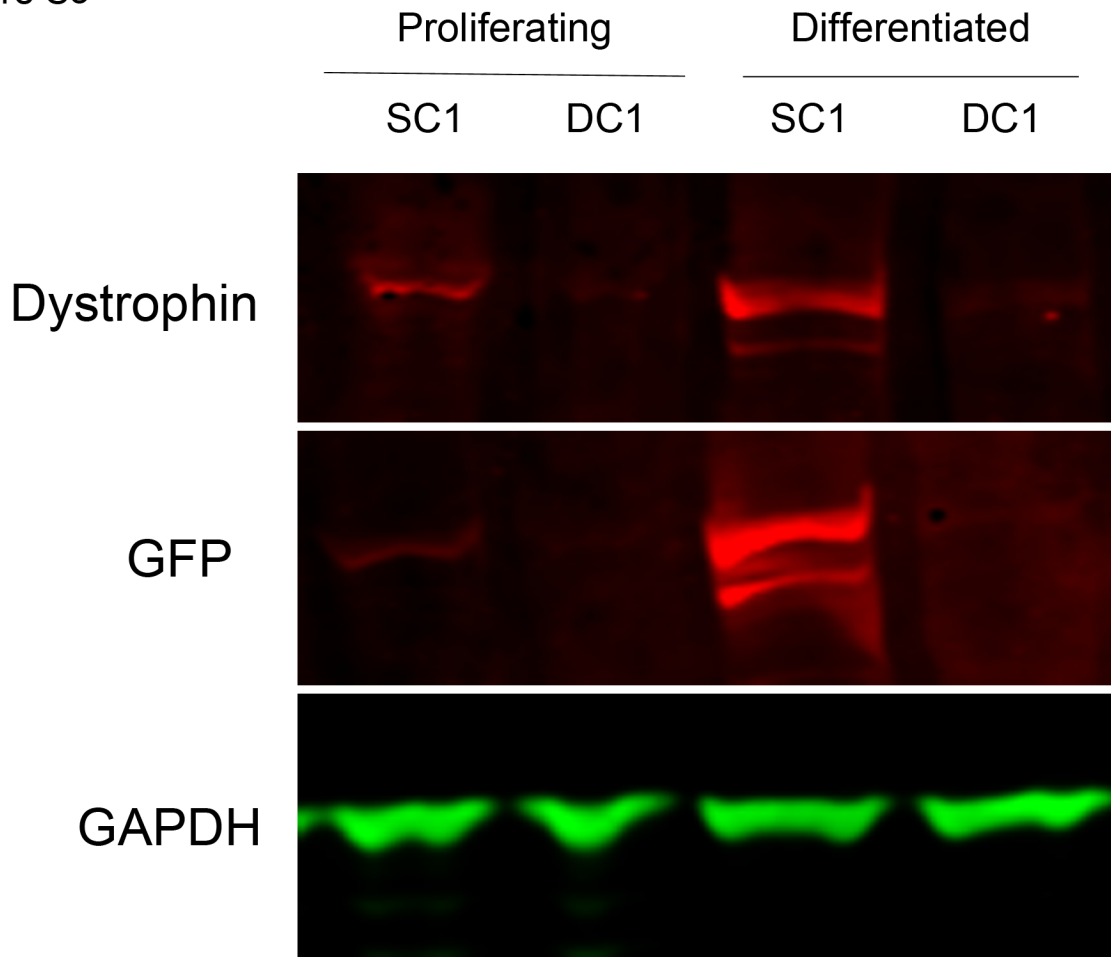

Figure S4

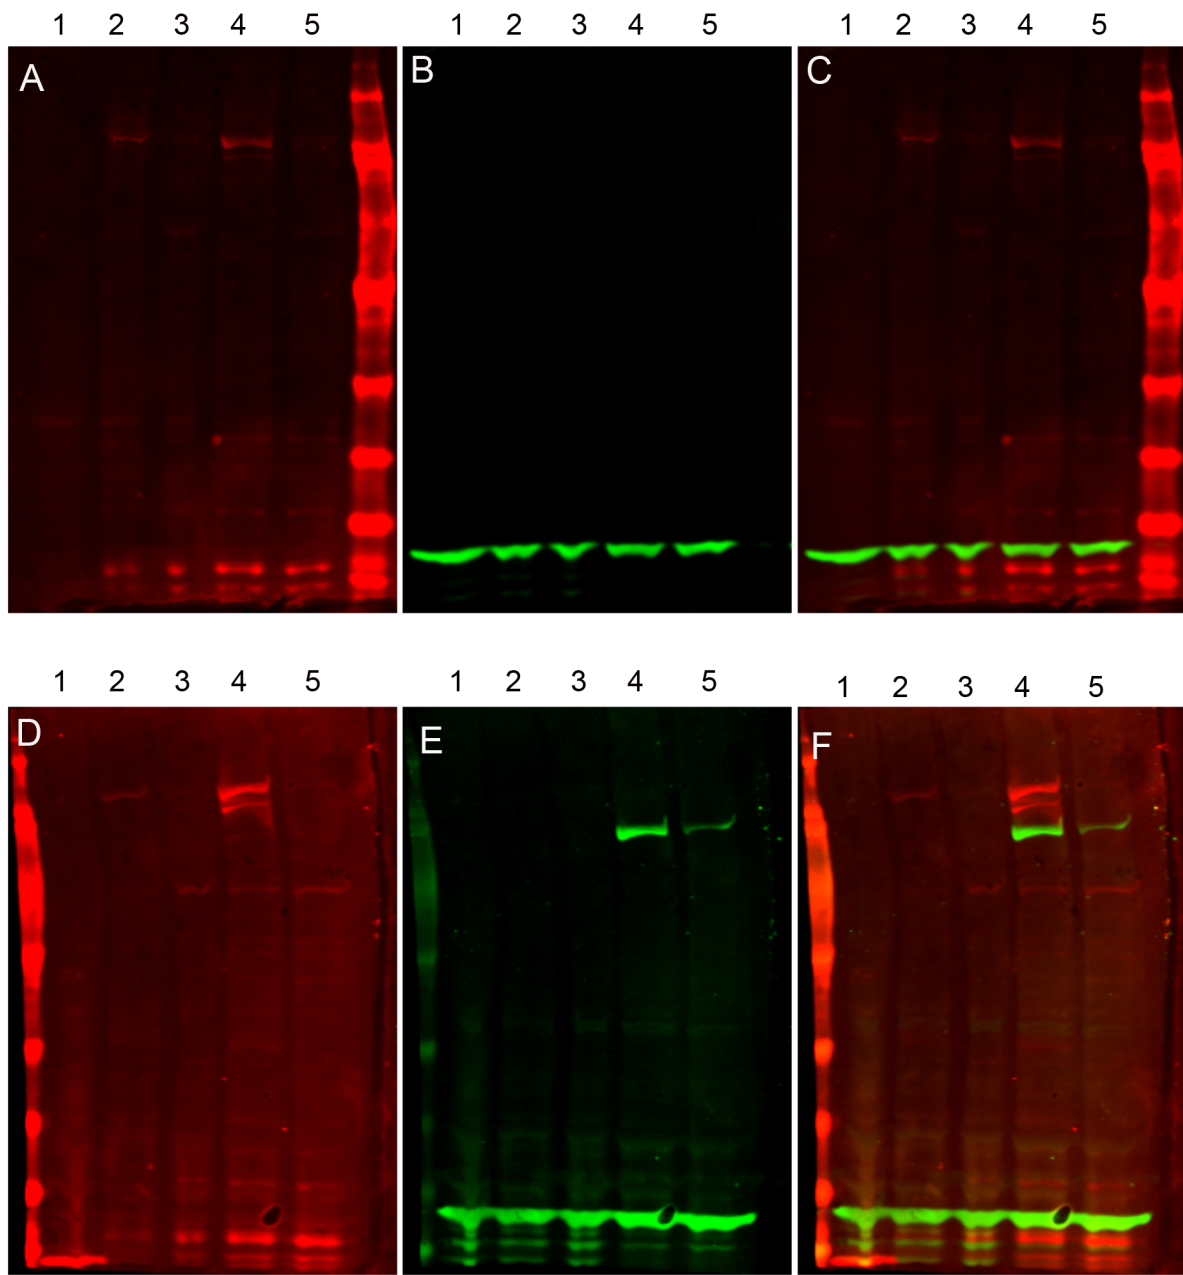

Supplement: srep19750-s1.pdf [file srep19750-s1.pdf]
